# Supplementary material for: ERp29 inhibits tumorigenicity by suppressing epithelial mesenchymal transition in gastric cancer
Source: PubMed Central journal article supplement (PMC5667996; doi:10.18632/oncotarget.20225), 2017-08-12
Supplement: oncotarget-08-78757-s001.pdf [file oncotarget-08-78757-s001.pdf]

# ERp29 inhibits tumorigenicity by suppressing epithelial mesenchymal transition in gastric cancer

## SUPPLEMENTARY MATERIALS

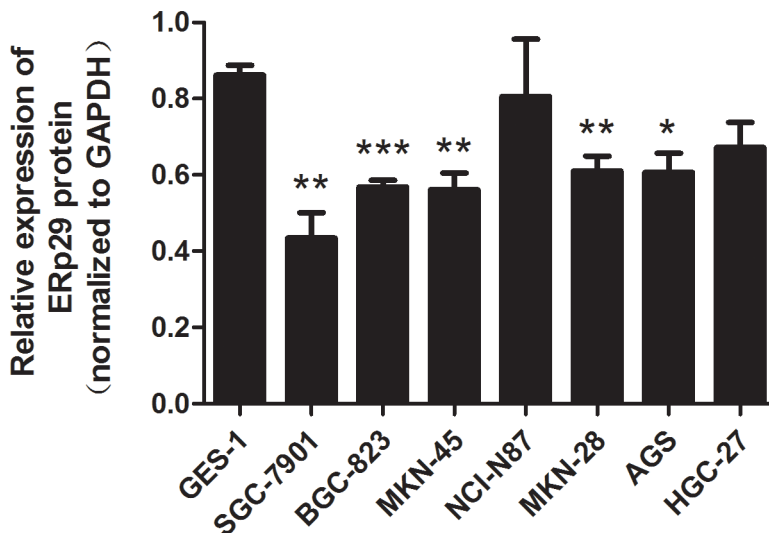

Supplementary Figure 1: Relative expression of ERp29 protein in human gastric cancer cell lines and normal gastric mucosal epithelial cell line. (Compared to GES-1 \*\*\*P < 0.001, \*\*P < 0.01, \*P < 0.05).

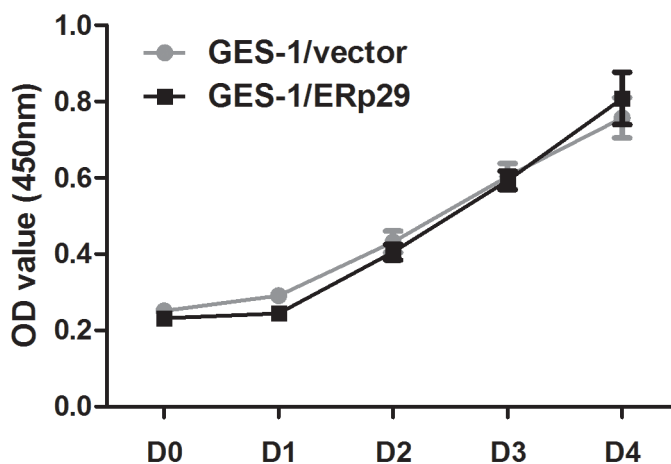

Supplementary Figure 2: Effects of ERp29 overexpression on cell growth in GES-1.

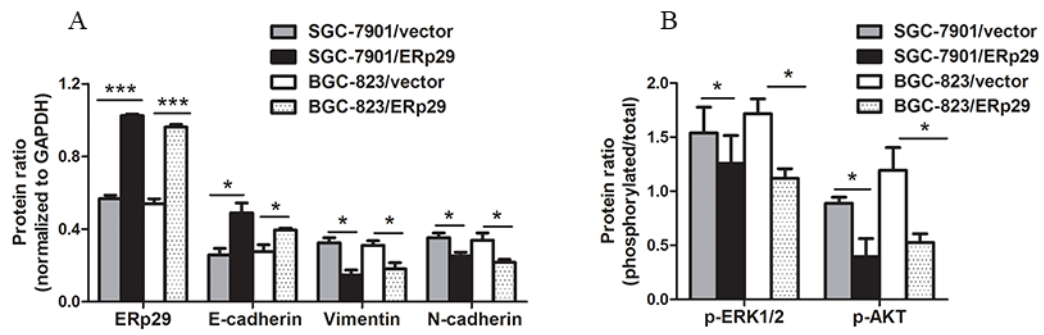

**Supplementary Figure 3: Protein ratio of EMT markers, ERK1/2 and AKT phosphorylation levels. (A)** Protein ratio of EMT markers in SGC-7901 and BGC-823 cells (\* $P < 0.05$ ). **(B)** Protein ratio of ERK1/2 and AKT phosphorylation levels in SGC-7901 and BGC-823 cells (\* $P < 0.05$ ).
